# Supplementary material for: Binder-free metal fibril-supported Fe2O3 anodes for high-performance lithium-ion batteries
Source: Royal Society of Chemistry journal article supplement (doi:10.1039/c3ta15105k), 2014-01-01
Supplement: c3ta15105k.pdf [file c3ta15105k.pdf]

## Supplementary Information

### Binder-Free Metal Fibril-Supported Fe<sub>2</sub>O<sub>3</sub> Anode for High- Performance Lithium-Ion Batteries

Dong Jin Lee,<sup>a,‡</sup> Jaecheol Choi,<sup>b,‡</sup> Myung-Hyun Ryou<sup>b</sup>, Chang-Hyeon Kim<sup>c</sup>, Yong Min Lee<sup>b,\*</sup> and Jung-Ki Park<sup>a,\*</sup>

<sup>a</sup> Department of Chemical and Biomolecular Engineering, Korea Advanced Institute of Science and Technology, 373-1, Guseong-dong, Yuseong-gu, Daejeon 305-701, Republic of Korea.

<sup>b</sup> Department of Chemical and Biological Engineering, Hanbat National University, Daejeon, 305-719, Republic of Korea.

<sup>c</sup> Shine Co. Ltd., 192-12, Busan, 614-865, Republic of Korea.

Email: [jungpark@kaist.ac.kr](mailto:jungpark@kaist.ac.kr), [yongmin.lee@hanbat.ac.kr](mailto:yongmin.lee@hanbat.ac.kr)

‡ These authors contributed equally to this work

## Experimental Section

The fabrication of Fe<sub>2</sub>O<sub>3</sub>/SF was carried out by using RF magnetron sputtering method. The base vacuum pressure of the stainless-steel chamber was  $2.0 \times 10^{-5}$  Torr, and the working pressure was  $7.0 \times 10^{-3}$  Torr of Ar (99.999%). The target used was Fe<sub>2</sub>O<sub>3</sub> (99.99%) and the distance between the target and the substrate was 7 cm. The Fe<sub>2</sub>O<sub>3</sub> target was pre-sputtered for 10 min at 200 W to remove the contaminants on the surface before deposition on the SF substrates (Shine co. Ltd., Korea). The deposition was conducted for 20 min at 25 °C on both side of the SF substrate at 200 W. Copper foil was used for comparative study of different substrate structure and deposition conditions are same as the Fe<sub>2</sub>O<sub>3</sub>/SF cases. The surface morphology and cross-sectional image of the samples were examined using field emission scanning electron microscope (FE-SEM, S4800, Hitachi). In order to prepare a cross-sectional specimen of Fe<sub>2</sub>O<sub>3</sub>/SF electrode, it was cut by an argon-ion beam polisher (E3500, Hitachi) at a constant power of 2.1 W (6 kV and 0.35 mA) under vacuum ( $< 2.0 \times 10^{-4}$  Pa). The surface chemical composition of Fe<sub>2</sub>O<sub>3</sub>/SF electrodes were investigated by X-ray photoelectron spectroscopy (XPS, Thermo VG scientific).

The 2032 coin type half cells were prepared by assembling the electrodes (Fe<sub>2</sub>O<sub>3</sub>/SF or Fe<sub>2</sub>O<sub>3</sub>/Cu foil), Li metal as counter electrodes, polyethylene separator (Asahi-Kasai) that was soaked with the liquid electrolyte (1 M LiPF<sub>6</sub> in EC/DEC (50/50 by vol%)) containing 5 wt.% of fluoroethylene carbonate (PANAX ETEC) in an Ar filled glove box. The H<sub>2</sub>O content of the electrolyte was less than 10 ppm. The loading density of active material, Fe<sub>2</sub>O<sub>3</sub>, was 0.4 mg cm<sup>-2</sup>. The assembled unit cells were cycled at various constant current rates from 40 mA g<sup>-1</sup> to 16000 mA g<sup>-1</sup> in the potential range of 0.05 - 3.0 V (vs. Li/Li<sup>+</sup>) using a WBCS 3000 battery tester (Wonatech) at 25 °C. Electrochemical impedance spectroscopy (EIS)

measurements were conducted using the VSP impedance analyzer (Bio-logic SAS) over a frequency range of 0.05 Hz to 1 MHz at an amplitude of 10 mV.

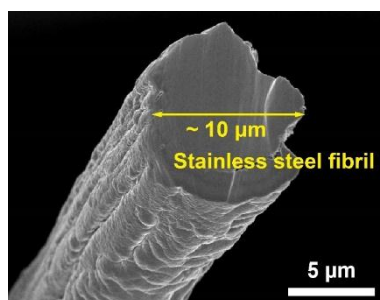

**Figure S1.** A cross-sectional SEM image of pristine stainless steel fibrils (SF) before  $\text{Fe}_2\text{O}_3$  sputtering.

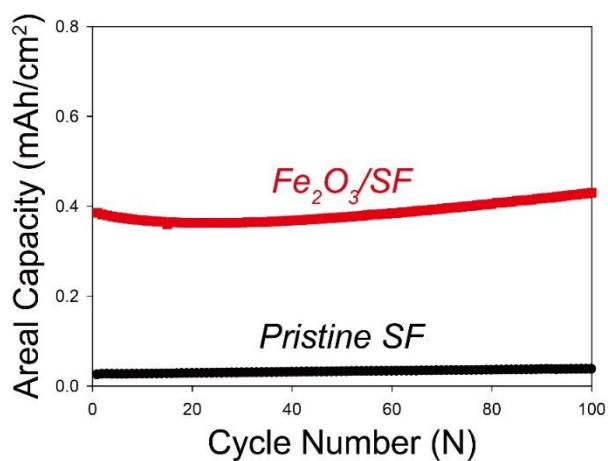

**Figure S2.** Cycling performance of  $\text{Fe}_2\text{O}_3/\text{SF}$  and pristine SF at  $0.16 \text{ mA/cm}^2$ .

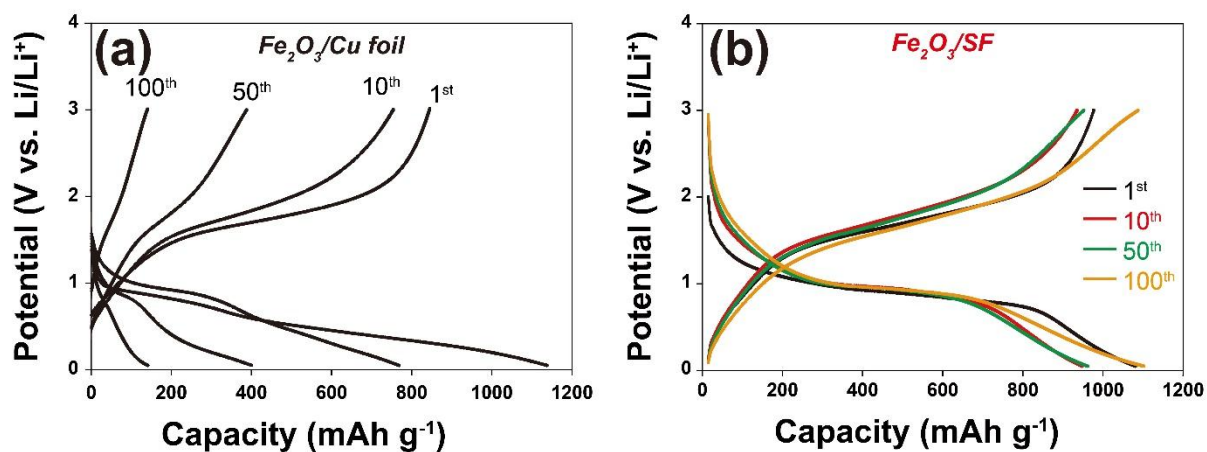

**Figure S3.** Potential profiles of (a) the  $\text{Fe}_2\text{O}_3/\text{Cu}$  foil and (b) the  $\text{Fe}_2\text{O}_3/\text{SF}$  electrode (the numbers indicate cycle number) at  $400 \text{ mA g}^{-1}$ .

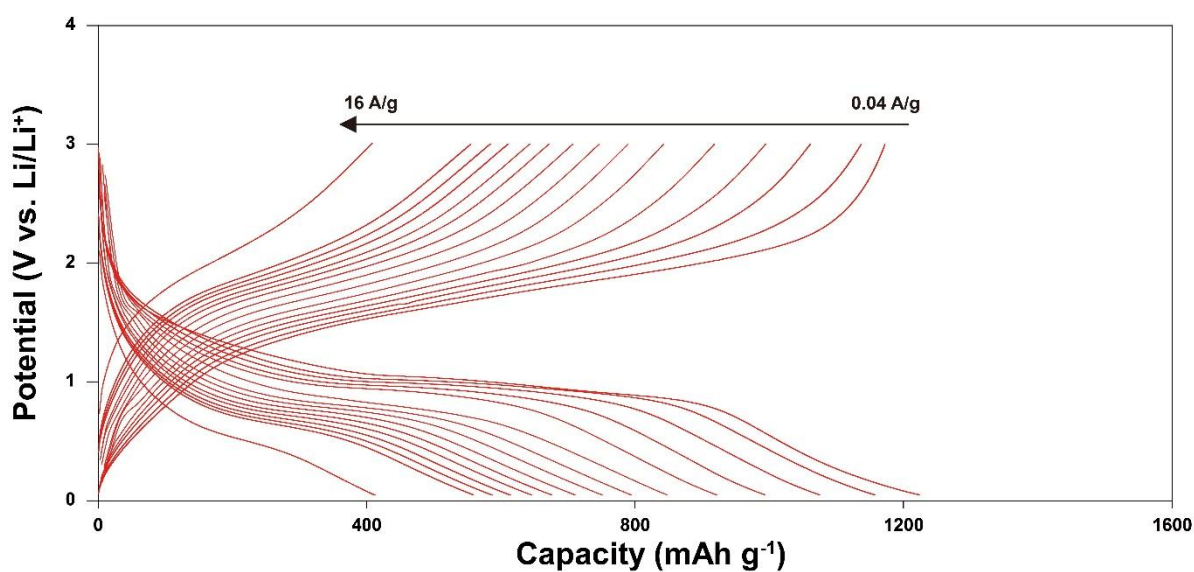

**Figure S4.** Potential profiles of the  $\text{Fe}_2\text{O}_3/\text{SF}$  electrode measured at a series of current rates.

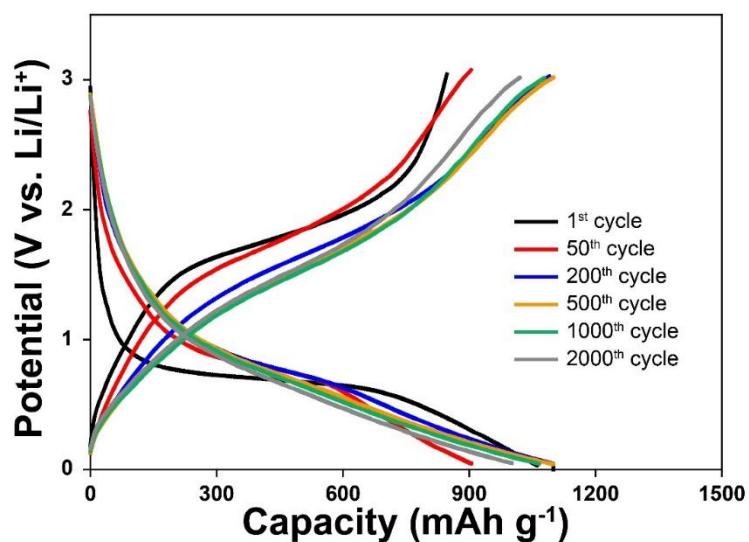

**Figure S5.** Potential profiles at  $8000 \text{ mA g}^{-1}$  of the  $\text{Fe}_2\text{O}_3/\text{SF}$  electrode (the numbers indicate cycle number).

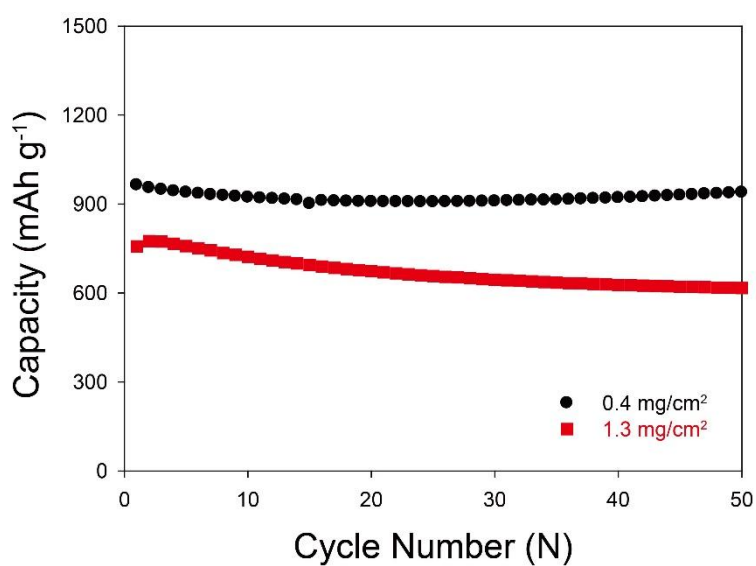

**Figure. S6.** Cycling performances of the unit cells using  $\text{Fe}_2\text{O}_3/\text{SF}$  based on different mass loadings of  $\text{Fe}_2\text{O}_3$ .

| Reference    | Anode Materials                                                     | Rate Capability (mAh/g) | Reversible Capacity (mAh/g)       |
|--------------|---------------------------------------------------------------------|-------------------------|-----------------------------------|
| In this work | Fe <sub>2</sub> O <sub>3</sub> /SF                                  | ~710 @ 4 A/g            | ~ 1000 @ 8 A/g after 2000 cycles  |
|              |                                                                     | ~560 @ 8 A/g            |                                   |
|              |                                                                     | ~420 @ 16 A/g           |                                   |
| #1           | α-Fe <sub>2</sub> O <sub>3</sub> /RGO composite                     | ~332 @ 10 A/g           | ~ 516 @ 3 A/g after 150 cycles    |
| #2           | Mesoporous Fe <sub>2</sub> O <sub>3</sub>                           | ~424 @ 10 A/g           | ~ 911 @ 0.2 A/g after 50 cycles   |
| #3           | C/α-Fe <sub>2</sub> O <sub>3</sub> nanotube arrays                  | ~250 @ 8 A/g            | ~ 659 @ 0.1 A/g after 150 cycles  |
| #4           | Hierarchical Hollow Spheres of Fe <sub>2</sub> O <sub>3</sub> @PANI | ~724 @ 10 A/g           | ~ 893 @ 0.1 A/g after 100 cycles  |
| #5           | α-Fe <sub>2</sub> O <sub>3</sub> xerogel                            | ~280 @ 10 A/g           | ~ 600 @ 5 A/g after 1000 cycles   |
| #6           | Fe <sub>2</sub> O <sub>3</sub> -GNS                                 | ~633 @ 5 A/g            | ~ 633 @ 5 A/g after 100 cycles    |
| #7           | Fe <sub>2</sub> O <sub>3</sub> /graphene                            | ~420 at 5 A/g           | ~ 800 at 0.2 A/g after 100 cycles |
| #8           | Fe <sub>2</sub> O <sub>3</sub> nanorods on CNFs                     | ~245 at 10 A/g          | ~ 758 at 0.2 A/g after 50 cycles  |

**Table S1.** Summary of previous studies on electrochemical performances of various Fe<sub>2</sub>O<sub>3</sub> anode materials.

1. J. Qu, Y.-X. Yin, Y.-Q. Wang, Y. Yan, Y.-G. Guo and W.-G. Song, *ACS Appl. Mater. Interfaces*, 2013, **5**, 3932-3936.
2. X. Xu, R. Cao, S. Jeong and J. Cho, *Nano Lett.*, 2012, **12**, 4988-4991.
3. J. Liu, Y. Li, H. Fan, Z. Zhu, J. Jiang, R. Ding, Y. Hu and X. Huang, *Chem. Mater.*, 2009, **22**, 212-217.
4. J.-M. Jeong, B. G. Choi, S. C. Lee, K. G. Lee, S.-J. Chang, Y.-K. Han, Y. B. Lee, H. U. Lee, S. Kwon, G. Lee, C.-S. Lee and Y. S. Huh, *Adv. Mater.*, 2013, **25**, 6250-6255.

5. X. Jia, J. J. Chen, J. H. Xu, Y. N. Shi, Y. Z. Fan, M. S. Zheng and Q. F. Dong, *Chem. Commun.*, 2012, **48**, 7410-7412.
6. Y. Zou, J. Kan and Y. Wang, *J. Phys. Chem. C*, 2011, **115**, 20747-20753.
7. M. Zhang, B. Qu, D. Lei, Y. Chen, X. Yu, L. Chen, Q. Li, Y. Wang and T. Wang, *J. Mater. Chem.*, 2012, **22**, 3868-3874.
8. Z. Liu and S. W. Tay, *Mater. Lett.*, 2012, **72**, 74-77.
